# Supplementary material for: The antibiotic peptaibol alamethicin from Trichoderma permeabilises Arabidopsis root apical meristem and epidermis but is antagonised by cellulase-induced resistance to alamethicin
Source: PubMed Central journal article supplement (PMC6086028; doi:10.1186/s12870-018-1370-x), 2018-08-10
Supplement: 12870_2018_1370_MOESM1_ESM.pdf [file 12870_2018_1370_MOESM1_ESM.pdf]

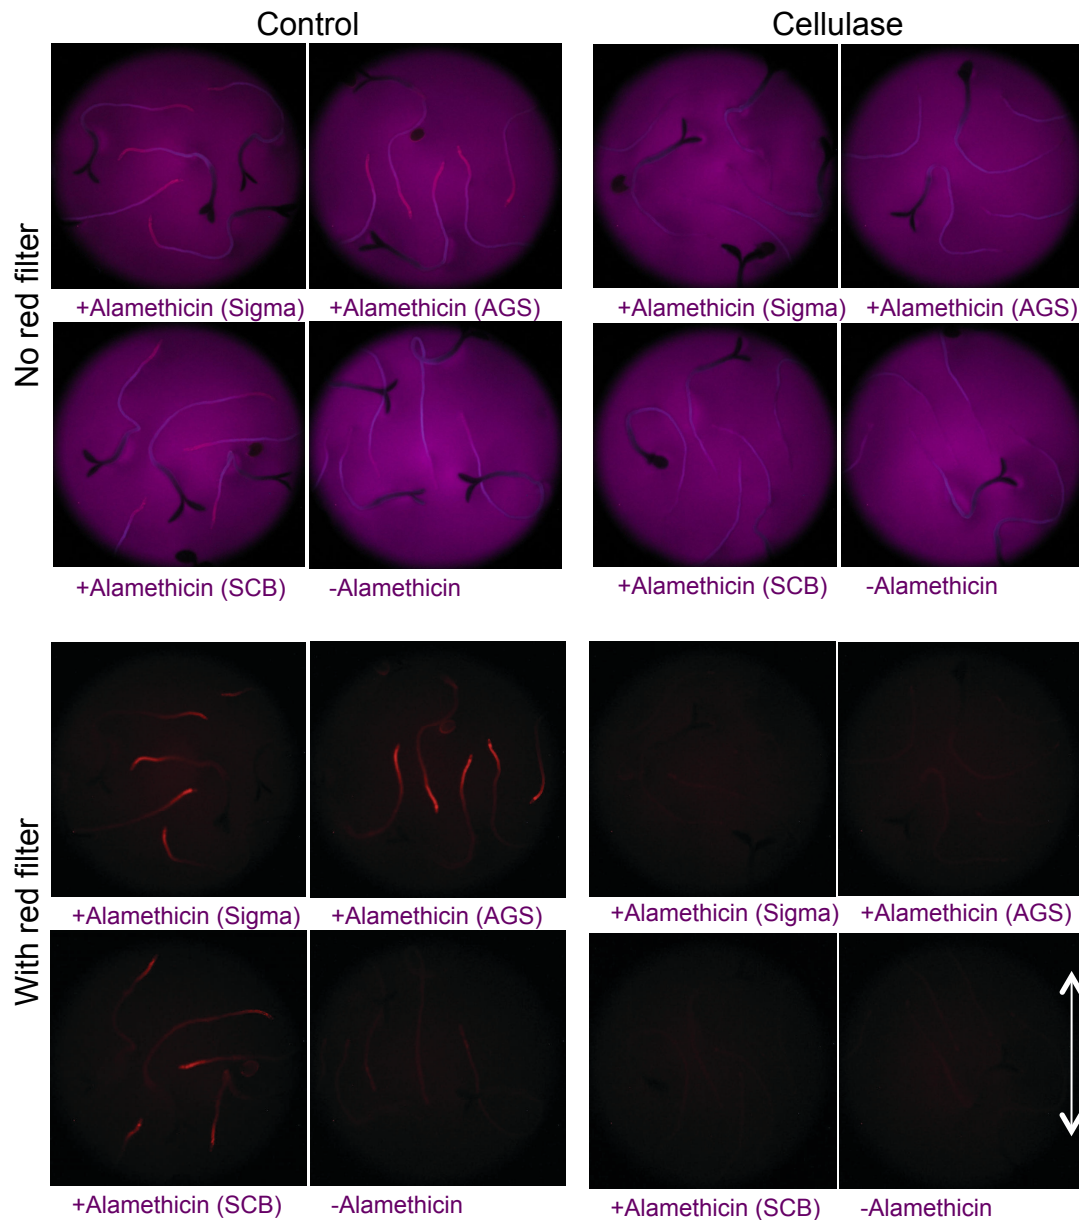

**Fig. S1 Permeabilisation of *A. thaliana* seedling with alamethicin from different sources**

Seedlings were grown, pre-treated with cellulase, permeabilised, stained, and documented as described for Fig.1, except using H<sub>2</sub>O in all steps instead of ½ MS and mannitol solution. Alamethicin from Sigma, A.G. Scientific (AGS) and Santa Cruz Biotechnology (SCB) were used. Bar corresponds to 5 mm. The images show one representative replicate out of two.
